# Supplementary material for: Is the state of health of rheumatoid arthritis patients receiving adequate treatment, predictable? - Results of a survey
Source: Springer Nature journal article supplement (doi:10.1186/s12891-015-0567-5), 2015-05-05

## Welcome to the questionnaire on the demographics of rheumatoid arthritis

1. How old were you when the first symptoms of rheumatoid arthritis occurred?  
\_\_\_\_\_ years
  
2. How old were you when the diagnosis rheumatoid arthritis was made?  
\_\_\_\_\_ years
  
3. What were your first symptoms of rheumatoid arthritis?  
**(more than one answer possible)**
  - swollen, painful joints
  - foot/knee / ankle pain
  - painful handshake
  - extreme fatigue
  - finger/wrist pain
  - lower back/shoulder pain
  - morning stiffness
  - other - namely: \_\_\_\_\_
  
4. How long did it take for a diagnosis of rheumatoid arthritis to be made after first symptoms?  
**(one answer)**
  - up to 3 months
  - 4 to 6 months
  - 7 to 12 months
  - 13 to 24 months
  - 3 to 4 years
  - 5 years and over
  
5. Which kind of doctor did you initially consult after first symptoms?  
**(one answer)**
  - general practitioner
  - specialist for internal medicine
  - specialist for orthopaedics
  - rheumatologist in private practice
  - rheumatologist in a hospital
  - other - namely: \_\_\_\_\_
  
6. How many doctors did you have to consult before the diagnosis of rheumatoid arthritis was made?  
**(one answer)**
  - 1 doctor
  - 2-3 doctors
  - 4-5 doctors
  - more than 5 doctors

7. Which kind of doctor diagnosed rheumatoid arthritis?  
**(one answer)**

- general practitioner
- specialist for internal medicine
- specialist for orthopaedics
- rheumatologist in private practice
- rheumatologist in a hospital
- other - namely: \_\_\_\_\_

8. How happy were you with the information supplied to you by the doctor who diagnosed rheumatoid arthritis?

On a scale of 1 to 5:  
 1 signifying very happy and  
 5 not at all happy  
 Fractional grading is also possible!

|            |                               |                               |                               |                               |                               |                  |
|------------|-------------------------------|-------------------------------|-------------------------------|-------------------------------|-------------------------------|------------------|
| very happy | 1<br><input type="checkbox"/> | 2<br><input type="checkbox"/> | 3<br><input type="checkbox"/> | 4<br><input type="checkbox"/> | 5<br><input type="checkbox"/> | not at all happy |
|------------|-------------------------------|-------------------------------|-------------------------------|-------------------------------|-------------------------------|------------------|

9. Were you consulted by your doctor on the choice of therapy?

- yes
- no

10. Which of the following aspects regarding medical care are of importance to you?

On a scale of 1 to 5:  
 1 signifying very important and  
 5 not at all important  
 Fractional grading is possible!

|                                                                | 1                             | 2                             | 3                             | 4                             | 5                             |
|----------------------------------------------------------------|-------------------------------|-------------------------------|-------------------------------|-------------------------------|-------------------------------|
|                                                                | very<br>important             |                               |                               |                               | not at all<br>important       |
| sufficient patient / doctor consultation                       | 1<br><input type="checkbox"/> | 2<br><input type="checkbox"/> | 3<br><input type="checkbox"/> | 4<br><input type="checkbox"/> | 5<br><input type="checkbox"/> |
| good explanation of the illness                                | 1<br><input type="checkbox"/> | 2<br><input type="checkbox"/> | 3<br><input type="checkbox"/> | 4<br><input type="checkbox"/> | 5<br><input type="checkbox"/> |
| sufficient sensitivity shown by physicians                     | 1<br><input type="checkbox"/> | 2<br><input type="checkbox"/> | 3<br><input type="checkbox"/> | 4<br><input type="checkbox"/> | 5<br><input type="checkbox"/> |
| sufficient care taken when prescribing medication              | 1<br><input type="checkbox"/> | 2<br><input type="checkbox"/> | 3<br><input type="checkbox"/> | 4<br><input type="checkbox"/> | 5<br><input type="checkbox"/> |
| a right for the patient to have a say in the choice of therapy | 1<br><input type="checkbox"/> | 2<br><input type="checkbox"/> | 3<br><input type="checkbox"/> | 4<br><input type="checkbox"/> | 5<br><input type="checkbox"/> |
| swiftly scheduled appointments                                 | 1<br><input type="checkbox"/> | 2<br><input type="checkbox"/> | 3<br><input type="checkbox"/> | 4<br><input type="checkbox"/> | 5<br><input type="checkbox"/> |

11. Which medication are you taking presently?  
**(more than one answer possible)**

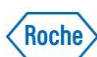

- Ebetrexat<sup>®</sup>, Methotrexat Ebewe<sup>®</sup> (Methotrexate)
- Salazopyrin<sup>®</sup> (Sulfasalazine)
- Arava<sup>®</sup> (Leflunomide)
- Resochin<sup>®</sup> (Chloroquine)
- Quensyl<sup>®</sup> (Hydroxychloroquine)
- Sandimmun<sup>®</sup> (Ciclosporine, Cyclosporine A)
- Ridaura<sup>®</sup> (Gold as tablets/oral Gold)
- Tauredon<sup>®</sup> (Gold as an injection/parenteral Gold)
- Aprednislon<sup>®</sup>, Urbason<sup>®</sup> (Cortisone)
- Enbrel<sup>®</sup> (Etanercept)
- MabThera<sup>®</sup> (Rituximab)
- Remicade<sup>®</sup> (Infliximab)
- Orencia<sup>®</sup> (Abatacept)
- Humira<sup>®</sup> (Adalimumab)
- RoActemra<sup>®</sup> (Tocilizumab)
- other - namely: \_\_\_\_\_

12. Do you also make use of complementary or alternative medicine?

- yes
- no

**If yes, which?** \_\_\_\_\_

13. Which form of medication do you prefer?  
**(One answer)**

- tablets
  - self-injection
  - infusion
  - no preference
- } → **continue to question 14**  
→ **continue to question 15**

14. What are your reasons for your preference for **tablets or injections or infusions**?

15. Which sources of information have you used in order to learn about rheumatoid arthritis?  
**(please tick where applicable!)**

How important do you think these sources of information were? **(Please assess every source!)**

On a scale of 1 to 5:

1 signifying very important and

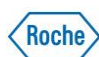

Die Umsetzung des Projektes erfolgt mit freundlicher Unterstützung von Roche Austria.  
Die Datenerhebung wird von Karmasin.Motivforschung Ges.m.b.H. durchgeführt.

5 not at all important  
 Fractional grading is possible

**How important do you think this source is?**

|                                                                            | <b>I have used<br/>this source</b> | <b>1</b>                  | <b>2</b>                 | <b>3</b>                 | <b>4</b>                 | <b>5</b>                 |
|----------------------------------------------------------------------------|------------------------------------|---------------------------|--------------------------|--------------------------|--------------------------|--------------------------|
|                                                                            |                                    | <b>very<br/>important</b> |                          |                          |                          | <b>not at all</b>        |
| reference journals/ books                                                  | <input type="checkbox"/>           | <input type="checkbox"/>  | <input type="checkbox"/> | <input type="checkbox"/> | <input type="checkbox"/> | <input type="checkbox"/> |
| newspaper articles or TV/radio broadcasts                                  | <input type="checkbox"/>           | <input type="checkbox"/>  | <input type="checkbox"/> | <input type="checkbox"/> | <input type="checkbox"/> | <input type="checkbox"/> |
| information leaflet with medicines                                         | <input type="checkbox"/>           | <input type="checkbox"/>  | <input type="checkbox"/> | <input type="checkbox"/> | <input type="checkbox"/> | <input type="checkbox"/> |
| internet                                                                   | <input type="checkbox"/>           | <input type="checkbox"/>  | <input type="checkbox"/> | <input type="checkbox"/> | <input type="checkbox"/> | <input type="checkbox"/> |
| homepage / product webpage of manufacturer                                 | <input type="checkbox"/>           | <input type="checkbox"/>  | <input type="checkbox"/> | <input type="checkbox"/> | <input type="checkbox"/> | <input type="checkbox"/> |
| information from pharmaceutical companies                                  | <input type="checkbox"/>           | <input type="checkbox"/>  | <input type="checkbox"/> | <input type="checkbox"/> | <input type="checkbox"/> | <input type="checkbox"/> |
| lectures and information evenings on rheumatism (e.g. Mini Med in Austria) | <input type="checkbox"/>           | <input type="checkbox"/>  | <input type="checkbox"/> | <input type="checkbox"/> | <input type="checkbox"/> | <input type="checkbox"/> |
| patient self-help groups                                                   | <input type="checkbox"/>           | <input type="checkbox"/>  | <input type="checkbox"/> | <input type="checkbox"/> | <input type="checkbox"/> | <input type="checkbox"/> |
| discussion with fellow patients                                            | <input type="checkbox"/>           | <input type="checkbox"/>  | <input type="checkbox"/> | <input type="checkbox"/> | <input type="checkbox"/> | <input type="checkbox"/> |
| your doctor                                                                | <input type="checkbox"/>           | <input type="checkbox"/>  | <input type="checkbox"/> | <input type="checkbox"/> | <input type="checkbox"/> | <input type="checkbox"/> |
| your chemist                                                               | <input type="checkbox"/>           | <input type="checkbox"/>  | <input type="checkbox"/> | <input type="checkbox"/> | <input type="checkbox"/> | <input type="checkbox"/> |
| family                                                                     | <input type="checkbox"/>           | <input type="checkbox"/>  | <input type="checkbox"/> | <input type="checkbox"/> | <input type="checkbox"/> | <input type="checkbox"/> |
| friends                                                                    | <input type="checkbox"/>           | <input type="checkbox"/>  | <input type="checkbox"/> | <input type="checkbox"/> | <input type="checkbox"/> | <input type="checkbox"/> |
| other – namely:                                                            | <input type="checkbox"/>           | <input type="checkbox"/>  | <input type="checkbox"/> | <input type="checkbox"/> | <input type="checkbox"/> | <input type="checkbox"/> |

16. Were you in employment prior to your illness?

- yes → **continue to question 17**
- no → **continue to question 19**

17. Did you have to give up your job as a result of the illness?

- yes → **continue to question 18**
- no → **continue to question 19**

18. How many years after the start of your illness did you have to give up your job?

- up to 1 year after the start

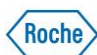

- 2 to 5 years after the start
- 6 to 10 years after the start
- over 10 years after the start

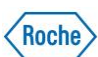

19. In your present situation, how important is financial help in the following areas?

On a scale of 1 to 5:  
 1 signifying very important and  
 5 not at all important  
 Fractional grading is possible

|                                                         | very<br>important        |                          |                          |                          | not at all<br>important  |
|---------------------------------------------------------|--------------------------|--------------------------|--------------------------|--------------------------|--------------------------|
|                                                         | 1                        | 2                        | 3                        | 4                        | 5                        |
| medication                                              | <input type="checkbox"/> | <input type="checkbox"/> | <input type="checkbox"/> | <input type="checkbox"/> | <input type="checkbox"/> |
| mobility and other aids                                 | <input type="checkbox"/> | <input type="checkbox"/> | <input type="checkbox"/> | <input type="checkbox"/> | <input type="checkbox"/> |
| health spa rehabilitation treatment                     | <input type="checkbox"/> | <input type="checkbox"/> | <input type="checkbox"/> | <input type="checkbox"/> | <input type="checkbox"/> |
| rehabilitation (e.g. physiotherapy)                     | <input type="checkbox"/> | <input type="checkbox"/> | <input type="checkbox"/> | <input type="checkbox"/> | <input type="checkbox"/> |
| help in the home                                        | <input type="checkbox"/> | <input type="checkbox"/> | <input type="checkbox"/> | <input type="checkbox"/> | <input type="checkbox"/> |
| care (i.e. help with personal hygiene)                  | <input type="checkbox"/> | <input type="checkbox"/> | <input type="checkbox"/> | <input type="checkbox"/> | <input type="checkbox"/> |
| cost of transport to doctors, therapists or to hospital | <input type="checkbox"/> | <input type="checkbox"/> | <input type="checkbox"/> | <input type="checkbox"/> | <input type="checkbox"/> |

20. How did your family and friends react to your diagnosis of rheumatoid arthritis  
**(more than one answer possible)**

- with concern
- with sympathy
- with a lack of understanding
- with offers of help
- my illness was not taken seriously
- with withdrawal
- nothing changed, everything was as before the illness
- little or nothing was known about my illness
- other - namely: \_\_\_\_\_

21. How do you estimate the state of your health will be in 10 years?  
**(one answer)**

- unchanged
- better
- worse

### A FEW MORE QUESTIONS ON STATISTICS



Sex:

- female
- male

Age: \_\_\_\_\_ (please fill in exact age and also tick below!)

- up to 30 years
- 31 to 45 years
- 46 to 60 years
- over 60 years

Level of severity of the illness rheumatoid arthritis:

- mild
- moderate / middling
- severe

Marital status:

- single
- married / cohabiting
- divorced / separated
- widowed

Level of education reached in the Austrian school system:

- nine compulsory years of school
- compulsory schooling plus apprenticeship
- vocational school / commercial school
- secondary school without a certificate
- secondary school with leaving certificate
- university

Occupation: which career category did / do you belong in?

- professional
- owner/director of a large company
- owner of a smaller company
- employee with minimal qualifications
- civil servant
- employee with superior qualifications
- civil servant with executive powers
- blue collar worker
- skilled worker (incl. apprentices)
- farmer
- in training
- home maker / on maternity leave
- retired

Total monthly income of all persons living in your household together. Please estimate if you do not have an exact sum.

- up to € 1.500,--
- up to € 2.100,--
- up to € 3.000,--
- up to € 3.000,--

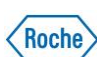

Province: Which Austrian province do you live in?

- Vienna
- Lower Austria
- Burgenland
- Styria
- Carinthia
- Upper Austria
- Salzburg
- Tyrol
- Vorarlberg

What is the population of your town or village?

- up to 5.000
- up to 50.000
- up to 50.000

What is the distance between your town or village and the provincial capital?

- under 20 km
- 21 to 50 km
- 51 to 100 km
- over 100 km

Which type of doctor is currently treating your rheumatoid arthritis?

**(one answer)**

- general practitioner
- specialist for internal medicine
- specialist for orthopaedics
- rheumatologist in private practice
- rheumatologist in a hospital
- other - namely: \_\_\_\_\_

Which means of transport do you usually use when seeing the doctor that treats your rheumatoid arthritis?

**(more than one answer possible)**

- underground
- tram
- bus
- train
- car
- on foot
- friends or relatives take me
- other - namely: \_\_\_\_\_

How long does your trip to see the doctor that treats your rheumatoid arthritis take?

**(one answer)**

- up to 15 minutes
- up to 30 minutes
- up to 1 hour
- up to 2 hours
- over 2 hours





Please inform us of the date on which you completed this questionnaire:

\_\_\_\_\_ day      \_\_\_\_\_ month      \_\_\_\_\_ year

**Please inform us of your contact details for the telephone survey:**

**Name:** \_\_\_\_\_

**Telephone number:** \_\_\_\_\_

**Email Address (optional):** \_\_\_\_\_

**Postal Address (optional):** \_\_\_\_\_

Participant number: 1  
(consecutively numbered)

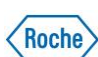

Supplement: MOESM1 [file 9752350]
